# Supplementary material
Source: PubMed Central journal article supplement (PMC5338678)
Supplement: supp_pp.16.01895_PP2016-01895DR1_Supplemental_Material.pdf [file supp_pp.16.01895_PP2016-01895DR1_Supplemental_Material.pdf]

SUPPLEMENTAL DATA

**The *Synechocystis* MANGANESE EXPORTER Mnx is essential for manganese homeostasis in cyanobacteria**

Fabian Brandenburg, Hanan Schoffman, Samantha Kurz, Ute Krämer, Nir Keren, Andreas P.M. Weber, Marion Eisenhut

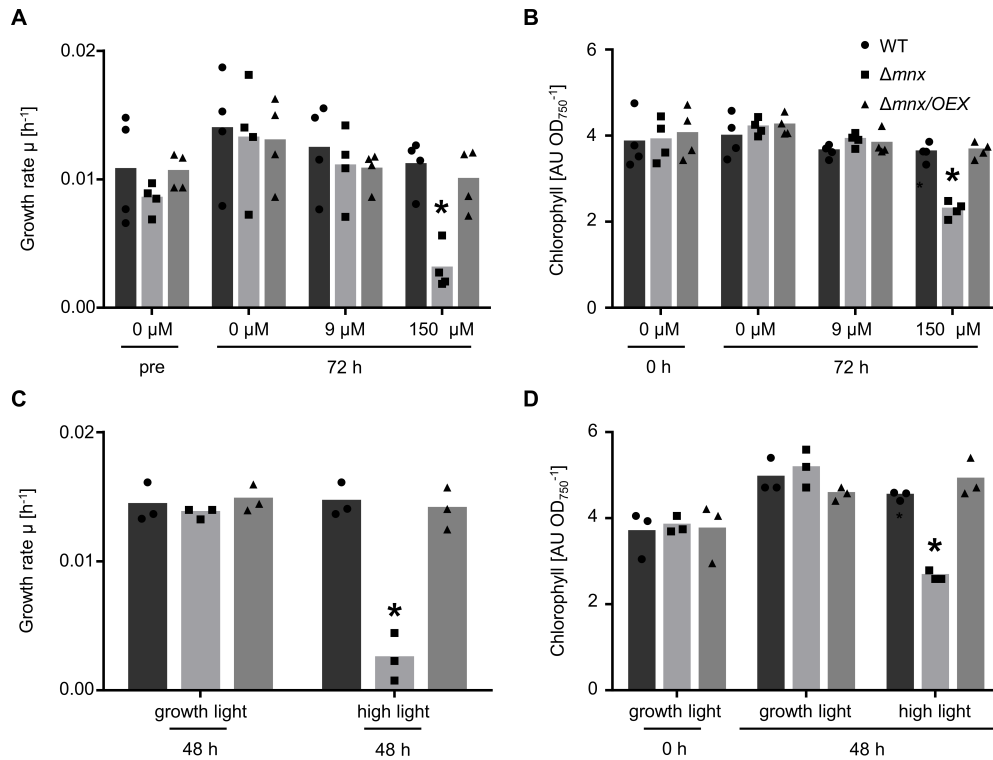

**Fig. S1:** Statistical analysis of growth rates and chlorophyll content. (A) Growth rates of WT,  $\Delta mnx$ , and  $\Delta mnx/OEX$  during 5 d of Mn limited pre-cultivation (pre) and during 72 h treatment with Mn concentrations as indicated. (B) Chlorophyll content after 5 d of Mn limited pre-cultivation (0 h) and after 72 h treatment with Mn concentrations as indicated. (C) Growth rates after 48 h cultivation under standard growth light ( $100 \mu mol photons m^{-2} s^{-1}$ ) or high light ( $1,000 \mu mol photons m^{-2} s^{-1}$ ) conditions. (D) Chlorophyll content at the beginning of the experiment (0 h) and after 48 h cultivation under standard growth light ( $100 \mu mol photons m^{-2} s^{-1}$ ) or high light ( $1,000 \mu mol photons m^{-2} s^{-1}$ ) conditions. Asterisks (\*) indicate significant changes to the respective WT value according to a two-way ANOVA ( $P \leq 0.05$ ).

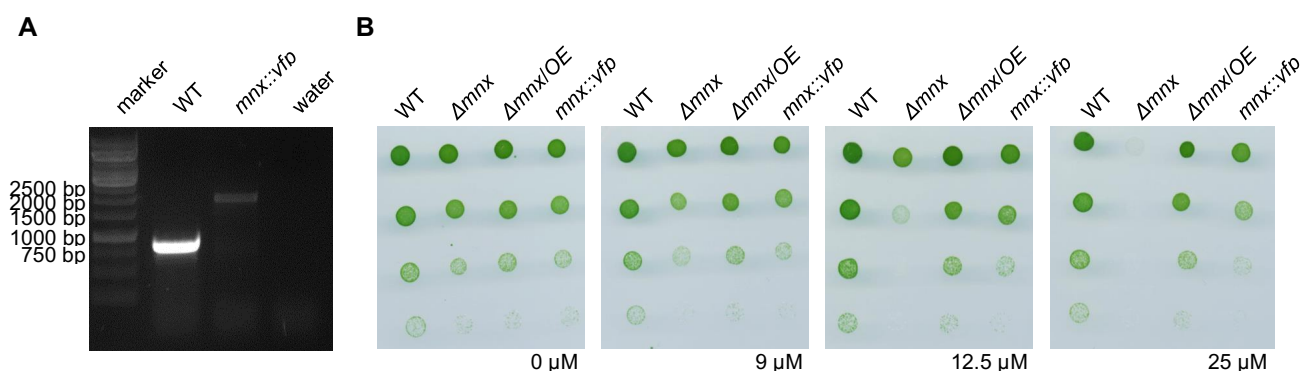

**Fig. S2:** Verification of genotype of *mnx::yfp* and functionality of Mnx::YFP proteins. (A) The genotype of the mutant *mnx::yfp* was verified by PCR using genomic DNA and primers binding to the *mnx* coding sequence and to the 3' region of *mnx*. The amplified fragment for *mnx::yfp* includes *mnx*, the inserted *yfp* and *KmR* genes, and 255 bp of the 3' region downstream of *mnx*. Water was used as a negative control. (B) The cells in mid log phase were diluted to an  $OD_{750}$  of 0.25. 2  $\mu L$  of these cultures and subsequent 1:10, 1:100 and 1:1,000 dilutions were spotted onto BG11 plates with increasing concentrations of  $MnCl_2$ . Pictures were taken after incubation for 4 d. The concentration of  $MnCl_2$  in standard BG11 medium is 9  $\mu M$ .

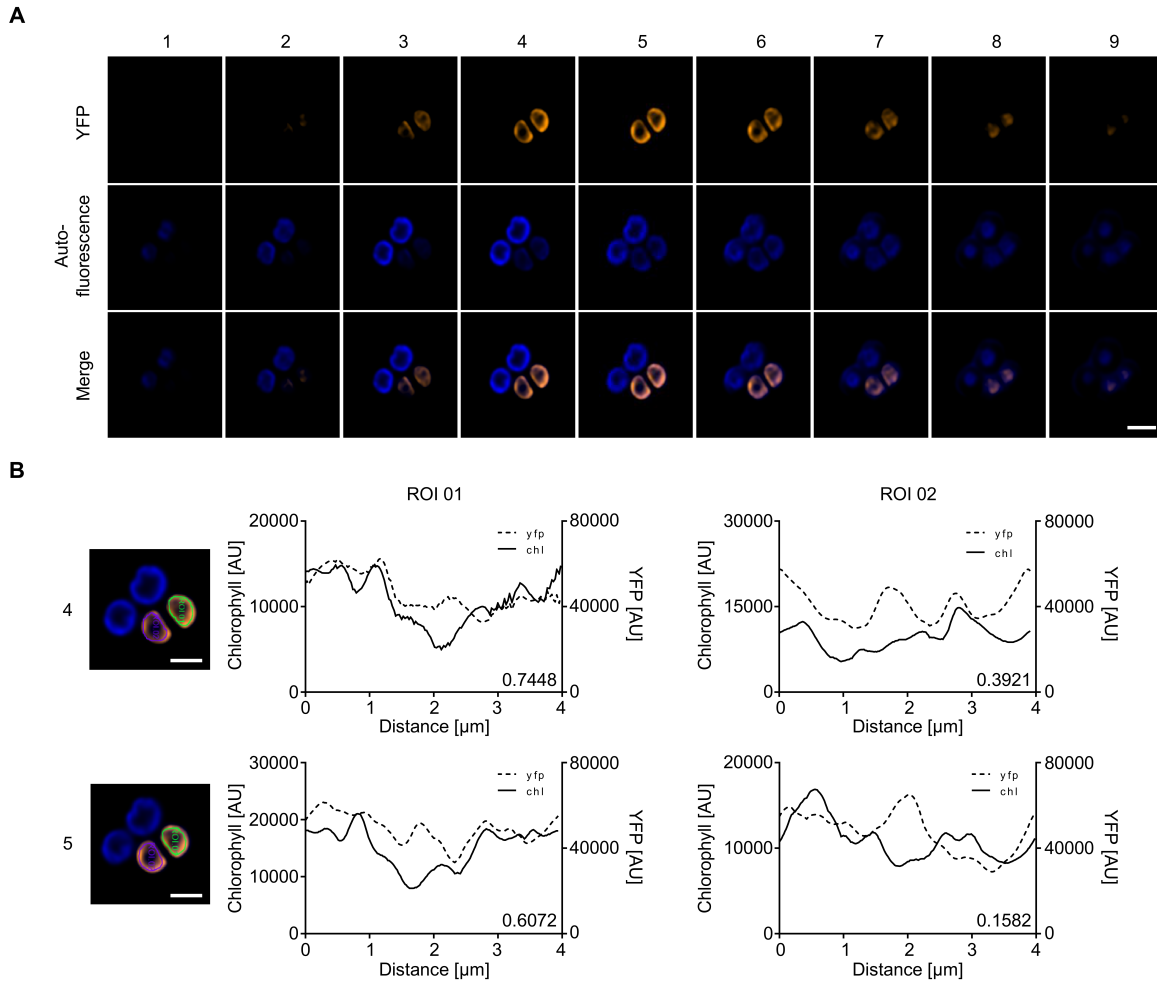

**Fig. S3:** Overview of fluorescence microscopy pictures of WT and *mnx::yfp* cells. (A) Full series of z-stacks used for localization of Mnx. Fig. 7 shows stack 5. The distance between two images is approximately 0.1  $\mu\text{m}$ . (B) Quantification of YFP and chlorophyll fluorescence along the cellular circumference for images 4 and 5. Region of interest (ROI) 01 is indicated in green and ROI 02 in purple. Spearman's rank correlation coefficients are given for each graph. The length of the scale bars is 1  $\mu\text{m}$ .

**Table S1:** List of GreenCut proteins strictly conserved in cyanobacterial genomes with predicted but so far unknown function in chloroplast transport processes. Proteins were extracted from the GreenCut2 inventory (Karpowicz et al., 2011). *Cre* protein ID according to JGI v3.0 of the *Cre* genome, *Syn* protein ID according to Cyanobase

C: Chloroplast; *Cre*: *Chlamydomonas reinhardtii*; iV: inner envelope; *Syn*: *Synechocystis* sp. PCC 6803;

| <i>Cre</i> protein name* | <i>Cre</i> protein ID* | <i>Syn</i> protein ID | Proposed function*                                                          | Domain*                                | Predicted location* | Encoded in cyanobacterial genomes (number)* |
|--------------------------|------------------------|-----------------------|-----------------------------------------------------------------------------|----------------------------------------|---------------------|---------------------------------------------|
| CGL98                    | <a href="#">114780</a> | SII0355               |                                                                             | Integral membrane protein DUF6         | C                   | 37                                          |
| PCD4                     | <a href="#">205606</a> | Slr0941               | possible lipid transport protein                                            | Polyketide_cyc(1)                      | C                   | 37                                          |
| TIC21                    | <a href="#">183668</a> | SII1737               | inner envelope membrane transporter protein, regulated by signaling pathway | Similar to AtTic20-like proteins       | iV                  | 37                                          |
| CPLD63                   | <a href="#">105873</a> | SII0615               | possible solute transporter                                                 | Uncharacterized protein family UPF0016 | iV                  | 36                                          |
| SNR2                     | <a href="#">146768</a> | Slr0305               | SNARE associated Golgi protein, green tissues                               | SNARE associated Golgi protein         | C                   | 35                                          |

\* according to Karpowicz et al., 2011

**Table S2:** Oligonucleotides used in this study. Restriction sites are underlined.

| Name  | Sequence (5' -> 3')                           | Experiment                                         |
|-------|-----------------------------------------------|----------------------------------------------------|
| ME29  | TTAACGGTCAGGCGATCA                            | Generation of knockout mutant in <i>mnx</i>        |
| ME30  | TAGATCTGATCGCCTTGC                            | Generation of knockout mutant in <i>mnx</i>        |
| ME57  | <u>CATATGATGCTGACCGCTTTTACT</u>               | Generation of <i>mnx</i> overexpression line       |
| ME58  | <u>GTTAACCTATGCAATCTTGGTCCA</u>               | Generation of <i>mnx</i> overexpression line       |
| FB24  | TCTTGGCCATACCATCTGTGC                         | RT-qPCR analysis, expression of <i>mnx</i>         |
| FB25  | CCACCAGGAAACCACAGCAA                          | RT-qPCR analysis, expression of <i>mnx</i>         |
| FB26  | AAGGTTGGTCTTTTTCCTGCC                         | RT-qPCR analysis, expression of <i>rnpB</i>        |
| FB27  | AGAGAGTTAGTCGTAAGCCGGG                        | RT-qPCR analysis, expression of <i>rnpB</i>        |
| SK102 | AGGAG <u>TCGACATGCTGACCGCTTTT</u><br>AC       | Expression of <i>mnx</i> in yeast                  |
| SK103 | AGGA <u>ACTAGTCTATGCAATCTTGGT</u><br>CCACC    | Expression of <i>mnx</i> in yeast                  |
| FB16  | cgagttttcagcaagatcaTTTGCCCTCACCTT<br>TGTG     | Generation of <i>mnx::yfp</i> line                 |
| FB17  | tgctcactccTGCAATCTTGGTCCACCA                  | Generation of <i>mnx::yfp</i> line                 |
| FB18  | caagattgcaGGAGTGAGCAAGGGCGAG                  | Generation of <i>mnx::yfp</i> line                 |
| FB19  | gttgcaaaatTTATAACTTGTACAGCTCGT<br>CCATG       | Generation of <i>mnx::yfp</i> line                 |
| FB20  | caagtataaATTTTGCAACAAATAACCA<br>C             | Generation of <i>mnx::yfp</i> line                 |
| FB21  | aatccgagtcGAGAGTGAGGACCTGCAG                  | Generation of <i>mnx::yfp</i> line                 |
| FB22  | cctcactctcGACTCGGATTTGCAGATC                  | Generation of <i>mnx::yfp</i> line                 |
| FB23  | agaatattgtaggagatcttCACGTAGGGTTGA<br>AACTTTTC | Generation of <i>mnx::yfp</i> line                 |
| FB31  | CACGTAGGGTTGAAACTTTTTCA                       | Together with ME57 verification of <i>mnx::yfp</i> |
